# Supplementary material for: Two-dimensional Cs3Sb2Br9 inducing transformation of three-dimensional CsPbBr3 to nanoplates
Source: Royal Society of Chemistry journal article supplement (doi:10.1039/d4cc00117f), 2024-01-01
Supplement: d4cc00117f1.pdf [file d4cc00117f1.pdf]

## Supporting Information

### Two-dimensional Cs<sub>3</sub>Sb<sub>2</sub>Br<sub>9</sub> Inducing Three-dimensional CsPbBr<sub>3</sub>

#### Transformation to Nanoplates

Wei Shen,<sup>‡\*a</sup> Jiayu Jiang,<sup>‡a</sup> Yanxing He,<sup>a</sup> Zhihua Chen,<sup>a</sup> Yue Qiu,<sup>a</sup> Hao Cui,<sup>a</sup> Yanfeng Chen,<sup>a</sup> Lihui Liu,<sup>a</sup> Gang Cheng,<sup>b</sup> Shufen Chen<sup>\*a</sup>

<sup>a</sup> *State Key Laboratory of Organic Electronics and Information Displays & Institute of Advanced Materials (IAM), Nanjing University of Posts & Telecommunications, Nanjing 210023, People's Republic of China.*

E-mail: iamwshen@njupt.edu.cn; iamsfchen@njupt.edu.cn

<sup>b</sup> *State Key Laboratory of Synthetic Chemistry, HKU-CAS Joint Laboratory on New Materials, and Department of Chemistry, The University of Hong Kong, Pokfulam Road, Hong Kong (P. R. China).*

<sup>‡</sup> W. S. and J. J. contributed equally to this work.

## Experimental section

**Chemical Materials.** Cesium carbonate ( $\text{Cs}_2\text{CO}_3$ , 99.99%), lead bromide ( $\text{PbBr}_2$ , 99%), 1-octadecene (ODE, 90%), oleic acid (OA, 90%), oleylamine (OLA, 80-90%), antimony bromide hydrate ( $\text{SbBr}_3 \cdot x\text{H}_2\text{O}$ , 99%) and N,N-Dimethylformamide (DMF, 99.9%) were purchased from Aladdin. Toluene (99.5%) was purchased from Nanjing Chemical Reagent Co. Ltd. All materials and solvents were directly used without further purification.

**Synthesis of Cs-OA.** 0.8140 g  $\text{Cs}_2\text{CO}_3$ , 2.5 mL OA and 10 mL ODE were mixed into a 100 mL three-neck flask and dried under vacuum at 120 °C for 1 h. Then the mixture was heated to 150 °C under  $\text{N}_2$  until the  $\text{Cs}_2\text{CO}_3$  powders were completely dissolved to form a transparent solution. The solution was cooled down to room temperature in an ice-water bath and preheated to 120 °C before use.

**Synthesis of  $\text{CsPbBr}_3$  NCs.**  $\text{CsPbBr}_3$  NCs were synthesized by the following method. Cs-OA (0.04 mmol),  $\text{PbBr}_2$  (0.10 mmol), OA (0.80 mmol) and OLA (0.40 mmol) were dissolved in 2 mL of DMF to prepare precursor solution. Then, 50  $\mu\text{L}$  of the precursor solution was injected into 2 mL of toluene under vigorous stirring at room temperature. After the  $\text{CsPbBr}_3$  crude solution was centrifuged at 5000 rpm for 3 min, we discarded the bottom sediment, the supernatant was used for further characterization.

**Synthesis of  $\text{CsPbBr}_3$  NPLs.**  $\text{CsPbBr}_3$  NPLs were synthesized by the following method. Cs-OA (0.04 mmol),  $\text{PbBr}_2$  (0.10 mmol), OA (0.80 mmol) and OLA (0.40 mmol) were dissolved in 2 mL of DMF to prepare precursor solution. 0.1 mmol  $\text{SbBr}_3$  was dissolved in 10 mL of toluene, which was diluted to different concentrations to tune Sb/Pb ratios. NPLs were prepared by injecting 50  $\mu\text{L}$  of DMF precursor solution into different concentrations of  $\text{SbBr}_3$  toluene solutions at room temperature with vigorous stirring. The centrifugation purification procedure was the same as that for  $\text{CsPbBr}_3$  NCs.

**Characterization.** The chemical compositions were determined using a PerkinElmer NexION 2000 inductively coupled plasma mass spectrometer (ICP-MS). X-ray diffraction (XRD) data were collected using a Bruker D8 Advance X-ray powder diffractometer with Cu  $K\alpha$  radiation ( $\lambda = 0.154$  nm). The morphology and size of NPLs

were confirmed by transmission electron microscopy (TEM) (Hitachi, HT7700) and high-resolution TEM (HRTEM) (Talos, F200X). The ultraviolet-visible (UV-vis) absorption spectra were recorded using a PerkinElmer Lambda 35S instrument in transmission mode. Photoluminescence (PL) spectra were recorded using a RF6000 spectrofluorometer with an excitation wavelength of 400 nm. The PL lifetimes were measured using an FLS920 fluorescence spectrometer with a pulse laser at 375 nm. The photoluminescence fluorescence quantum yield (PLQY), which is defined as the ratio of emitted photons to absorbed ones, was determined using a FLS920 fluorescence spectrometer equipped with an integrating sphere.

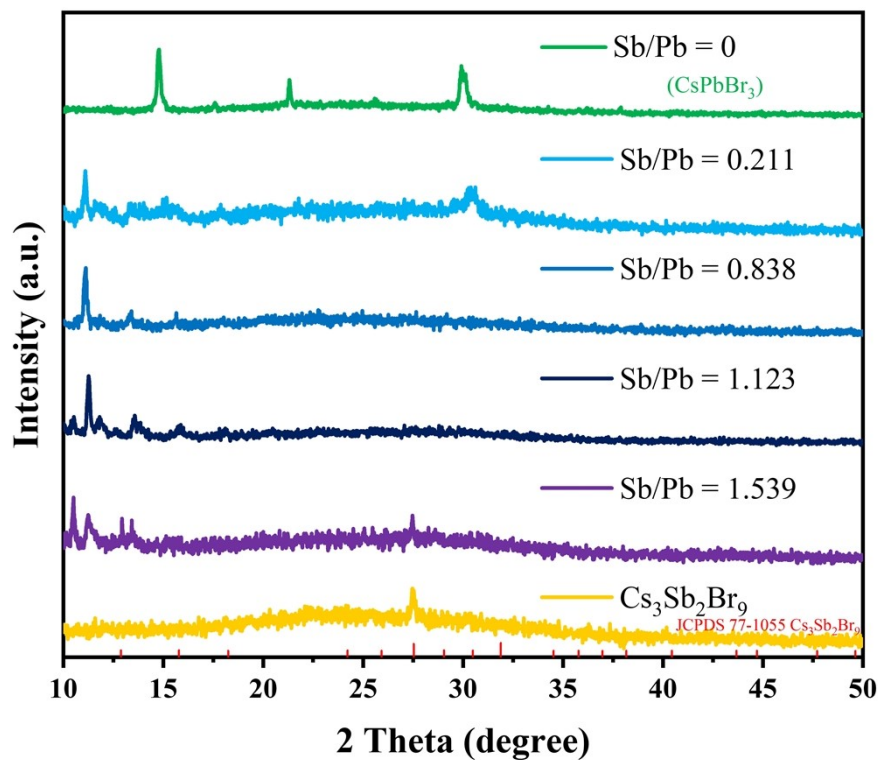

**Fig. S1.** XRD patterns of  $\text{CsPbBr}_3$  and  $\text{Cs}_3\text{Sb}_2\text{Br}_9$  samples with different Sb/Pb ratios.

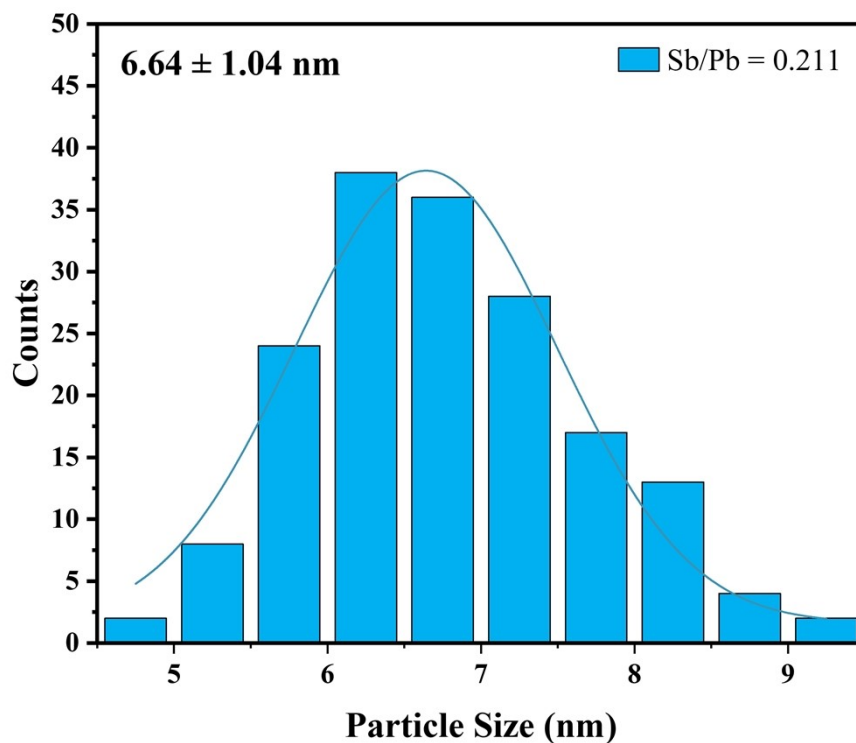

**Fig. S2.** Particle size distribution of  $\text{CsPbBr}_3$  NCs (Sb/Pb = 0.211).

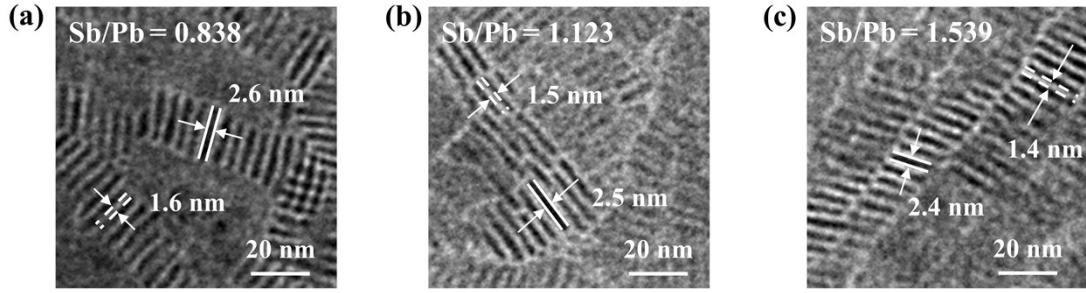

**Fig. S3.** Zoom-in TEM image of NPLs with different Sb/Pb ratios: (a) Sb/Pb = 0.838, (b) Sb/Pb = 1.123, and (c) Sb/Pb = 1.539.

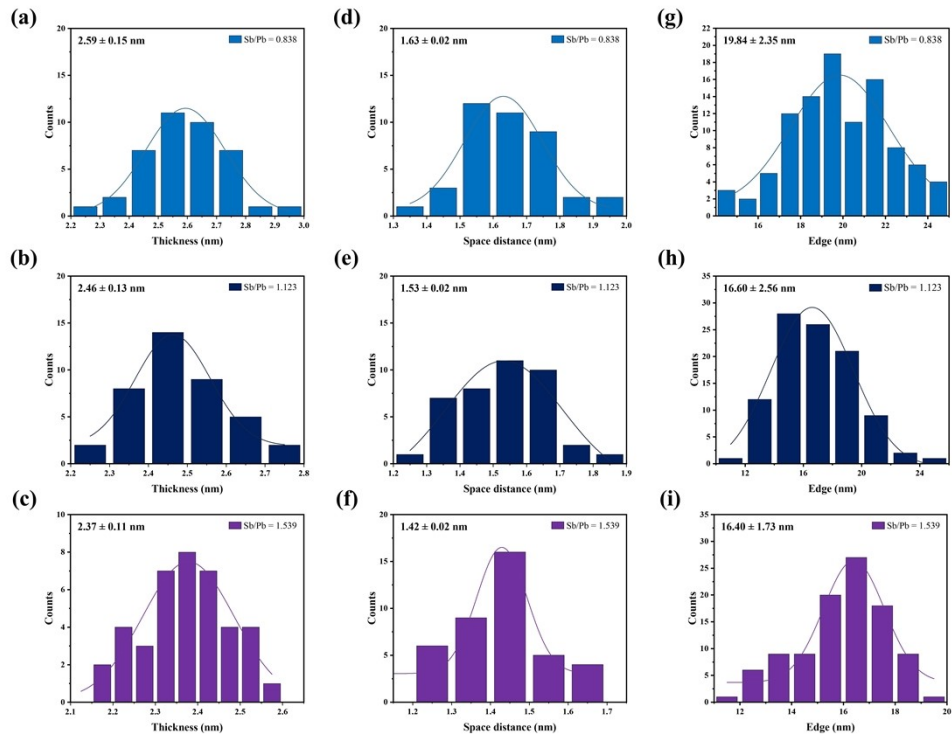

**Fig. S4.** Thickness (a-c), space distance (d-f), and edge (g-i) distributions for NPLs with different Sb/Pb ratios: (a), (d), (g) Sb/Pb = 0.838; (b), (e), (h) Sb/Pb = 1.123; and (c), (f), (i) Sb/Pb = 1.539.

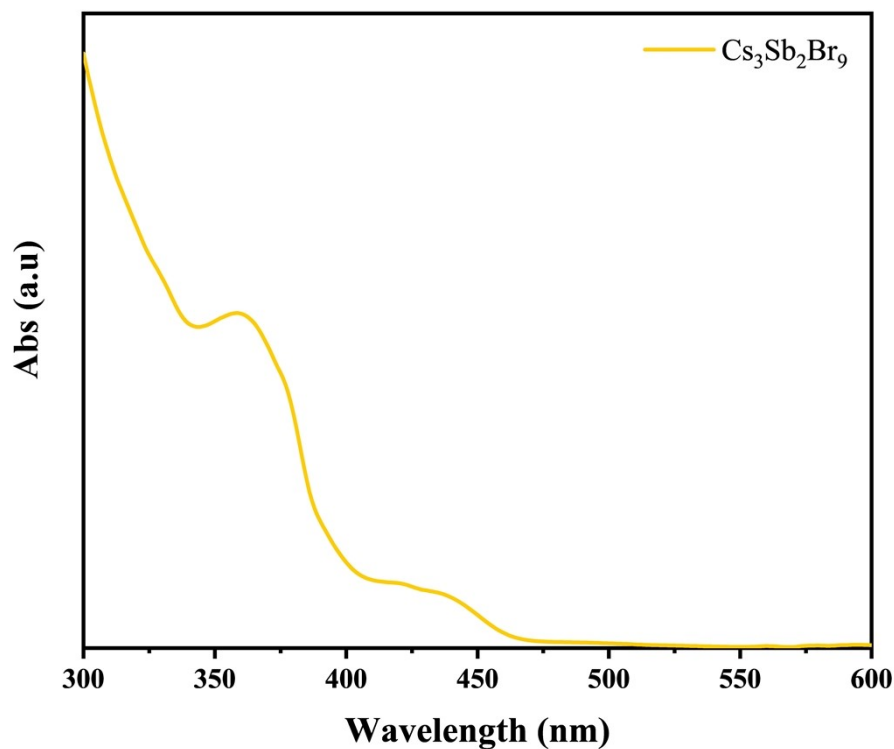

**Fig. S5.** UV-vis absorption spectrum for  $\text{Cs}_3\text{Sb}_2\text{Br}_9$ .

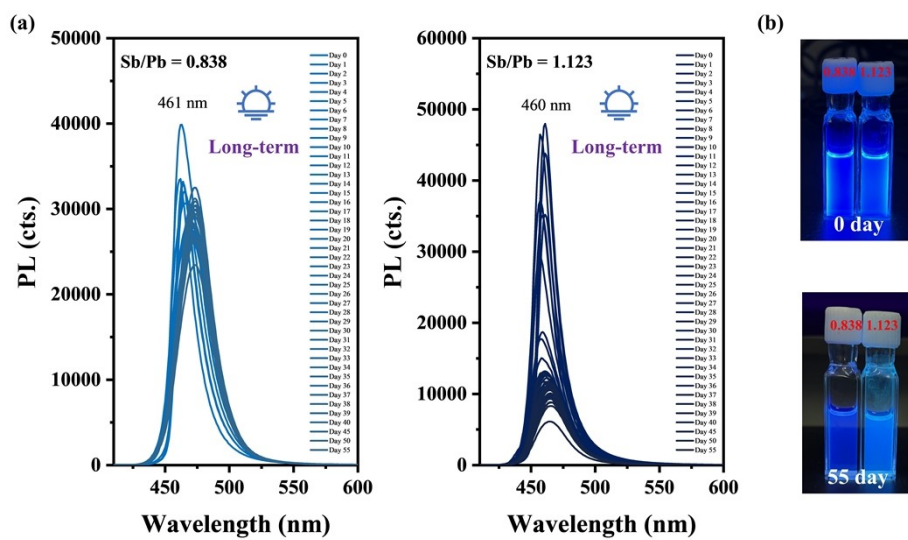

**Fig. S6.** (a) The long-term stabilities of deep blue NPLs: (left image  $\text{Sb/Pb} = 0.838$  and right image  $\text{Sb/Pb} = 1.123$ ). (b) The images of samples under UV light at 0 day and 55 days storage.

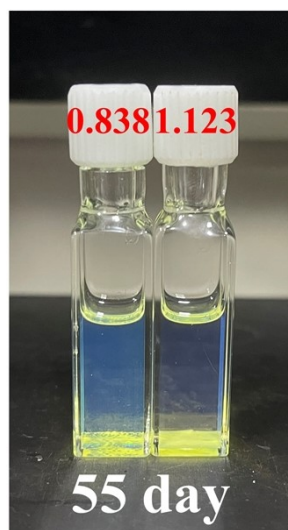

**Fig. S7.** The image of samples under sunlight at 55 days storage. (left image Sb/Pb = 0.838 and right image Sb/Pb = 1.123).

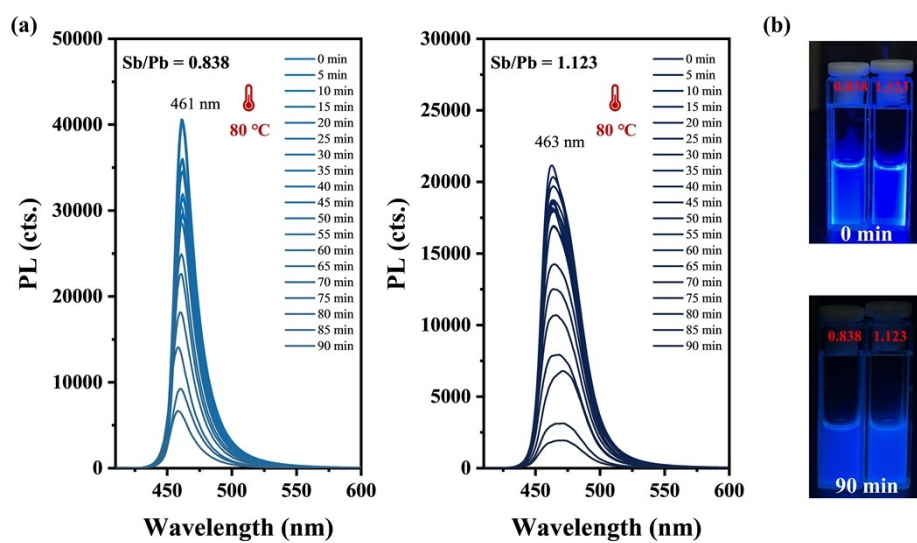

**Fig. S8.** (a) The thermal stabilities of deep blue NPLs at 80 °C: (left image Sb/Pb = 0.838 and right image Sb/Pb = 1.123). (b) The images of samples under UV light at 0 min and 90 mins aging.

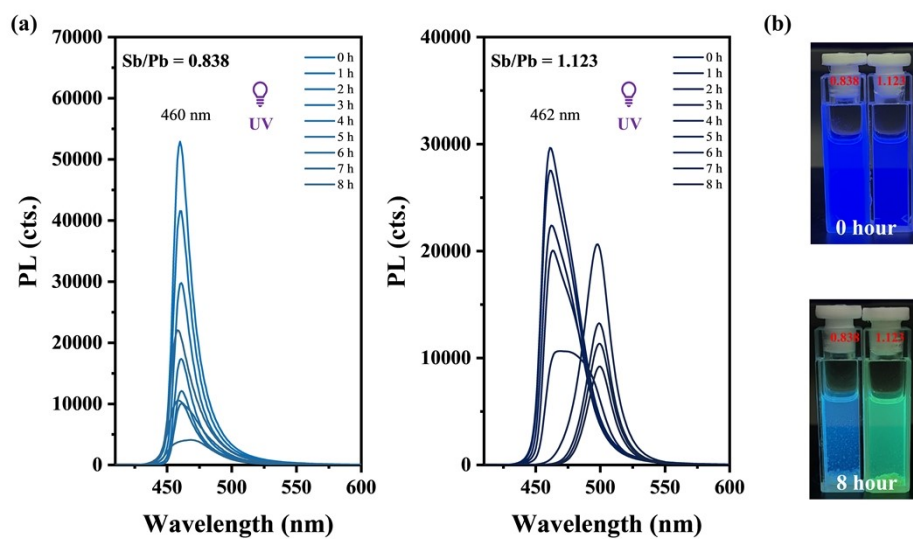

**Fig. S9.** (a) The UV resistance of deep blue NPLs under 365 nm (24 W) UV lamps: (left image  $\text{Sb/Pb} = 0.838$  and right image  $\text{Sb/Pb} = 1.123$ ). (b) The images of samples under UV light at 0 and 8 h aging.



**Table S1.** ICP-MS identification the actual Sb/Pb ratios.

| Samples<br>(feed Sb/Pb ratio) | Sb (ppb) | Pb (ppb) | Actual Sb/Pb ratio |
|-------------------------------|----------|----------|--------------------|
| B (0.5 : 1)                   | 2.345    | 18.871   | 0.211 : 1          |
| C (1.0 : 1)                   | 4.644    | 9.438    | 0.838 : 1          |
| D (1.5 : 1)                   | 8.177    | 12.408   | 1.123 : 1          |
| E (2.0 : 1)                   | 11.292   | 12.492   | 1.539 : 1          |

**Table S2.** PL lifetimes of different Sb/Pb ratios.

| Samples           | Sb/Pb=0 | Sb/Pb=0.211 | Sb/Pb=0.838 | Sb/Pb=1.123 | Sb/Pb=1.539 |
|-------------------|---------|-------------|-------------|-------------|-------------|
| $\tau_1$ (ns)     | 3.96    | 4.94        | 5.50        | 4.01        | 1.24        |
| $\tau_2$ (ns)     | 15.30   | 10.69       | 12.14       | 12.31       | 5.86        |
| A1                | 0.52    | 0.33        | 0.26        | 0.14        | 0.11        |
| A2                | 0.48    | 0.67        | 0.74        | 0.86        | 0.89        |
| $\tau_{avg}$ (ns) | 9.40    | 8.79        | 10.41       | 11.14       | 5.35        |

**Table S3.** PL lifetimes of different Sb/Pb ratios. (average lifetime,  $\tau_{\text{avg}}$ ; nonradiative composite lifetime,  $\tau_{\text{nr}}$ ; radiative decay rate,  $k_r$ ; radiative composite lifetime,  $\tau_r$ ; nonradiative decay rate,  $k_{\text{nr}}$ ; and PLQY)

| Samples                                              | Sb/Pb=0 | Sb/Pb=0.211 | Sb/Pb=0.838 | Sb/Pb=1.123 | Sb/Pb=1.539 |
|------------------------------------------------------|---------|-------------|-------------|-------------|-------------|
| $\tau_{\text{avg}}$ (ns)                             | 9.40    | 8.79        | 10.41       | 11.14       | 5.35        |
| PLQY (%)                                             | 66      | 47          | 53          | 33          | 0.60        |
| $\tau_r$ (ns)                                        | 14.24   | 18.70       | 19.64       | 33.75       | 891.67      |
| $k_r$ ( $\times 10^{-2} \text{ ns}^{-1}$ )           | 7.02    | 5.34        | 5.09        | 2.96        | 0.11        |
| $\tau_{\text{nr}}$ (ns)                              | 27.64   | 16.58       | 22.14       | 16.62       | 5.38        |
| $k_{\text{nr}}$ ( $\times 10^{-2} \text{ ns}^{-1}$ ) | 3.61    | 6.03        | 4.51        | 6.01        | 18.59       |
| $k_r/k_{\text{nr}}$                                  | 1.94    | 0.88        | 1.12        | 0.49        | 0.01        |

Radiative recombination lifetime,  $\tau_r = \tau_{\text{avg}}/\text{PLQY}$ ;

Non-radiative recombination lifetime,  $\tau_{\text{nr}} = \tau_{\text{avg}}/(1-\text{PLQY})$ ;

Radiative decay rate constant,  $k_r = 1/\tau_r$ ;

Non-radiative decay rate constant,  $k_{\text{nr}} = 1/\tau_{\text{nr}}$ .
